# Supplementary material for: Lifetime duration of lactation and chronic inflammation among middle-aged women with a history of gestational diabetes
Source: PubMed Central journal article supplement — BMJ Open Diabetes Res Care. 2020 Oct 28;8(2):e001229. doi: 10.1136/bmjdrc-2020-001229 (PMC7594200; doi:10.1136/bmjdrc-2020-001229), 2020-10-28
Supplement: bmjdrc-2020-001229supp001.pdf [file bmjdrc-2020-001229supp001.pdf]

Supplement Table Odds ratios (95% CI) for chronic inflammation among women with a history of gestational diabetes who are free of type 2 diabetes at follow-up, according to lifetime duration of lactation<sup>1</sup>

|         | 0 month | 1-12 months      | 12-24 months     | >24 months       | p-linear trend | per 1-y increase |
|---------|---------|------------------|------------------|------------------|----------------|------------------|
| Model 1 | 1       | 1.13 (0.70-2.60) | 0.78 (0.40-1.54) | 0.59 (0.30-1.16) | 0.002          | 0.88 (0.77-1.02) |
| Model 2 | 1       | 1.48 (0.76-2.91) | 0.79 (0.40-1.59) | 0.46 (0.22-0.94) | <0.0001        | 0.78 (0.65-0.92) |
| Model 3 | 1       | 1.62 (0.81-3.24) | 0.88 (0.43-1.81) | 0.51 (0.24-1.08) | 0.0003         | 0.79 (0.66-0.94) |

<sup>1</sup>Chronic inflammation is assessed using CRP 3mg/L cutoff (n=163 of 562 above 3mg/L). Model 1 is adjusted for age at follow-up blood draw. Model 2 is additionally adjusted for ethnicity (white / non-white), family history of diabetes (yes / no), parity, age at first birth (<25, 25-29, 30-34, ≥35 years), and menopausal status at follow-up blood draw (yes / no). Model 3 is adjusted for model 2 in addition to ever smoking (yes / no), diet quality (high / low), physical activity (high / low), and prepregnancy BMI (≤25, 25-30, >30 kg/m<sup>2</sup>)
